# Supplementary material
Source: Springer Nature journal article supplement (https://www.springermedizin.de/resource/supplementary/12889_2012_4837_MOESM1_ESM.pdf/9490764)

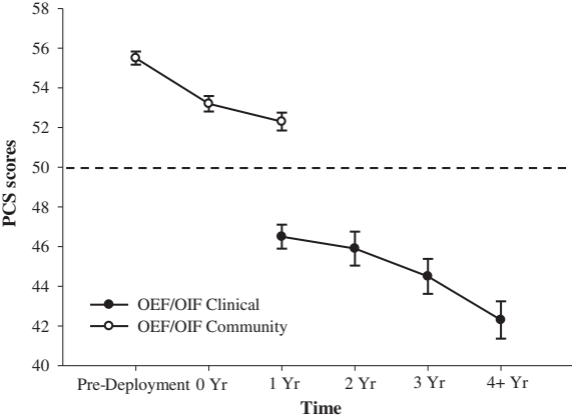

Supplement: MOESM1 [file 9490764]
